# Supplementary material for: A predictive algorithm for wetlands in deep time paleoclimate models
Source: Copernicus journal article supplement (doi:10.5194/gmd-12-1351-2019), 2019-04-04
Supplement: Supplementary file [file gmd-12-1351-2019-supplement-title-page.pdf › gmd-12-1351-2019-supplement-title-page.pdf]

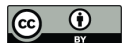

## *Supplement of*

# **A predictive algorithm for wetlands in deep time paleoclimate models**

**David J. Wilton et al.**

*Correspondence to:* David J. Wilton ([d.j.wilton@shef.ac.uk](mailto:d.j.wilton@shef.ac.uk))

- [gmd-12-1351-2019-supplement-title-page.pdf](#)
- DataExcellFigs
  - [fig03.txt](#)
  - [fig04.txt](#)
  - [fig06.txt](#)
  - [fig08.txt](#)
  - [fig09.txt](#)
- [README.txt](#)
- [predict\\_fw\\_maxKNN.cpp](#)

The copyright of individual parts of the supplement might differ from the CC BY 4.0 License.
